# Supplementary material for: MRI Visualization of Staphyloccocus aureus-Induced Infective Endocarditis in Mice
Source: PubMed Central journal article supplement (PMC4167704; doi:10.1371/journal.pone.0107179), 2014-09-17
Supplement: pone.0107179.s002.pdf [file pone.0107179.s002.pdf]

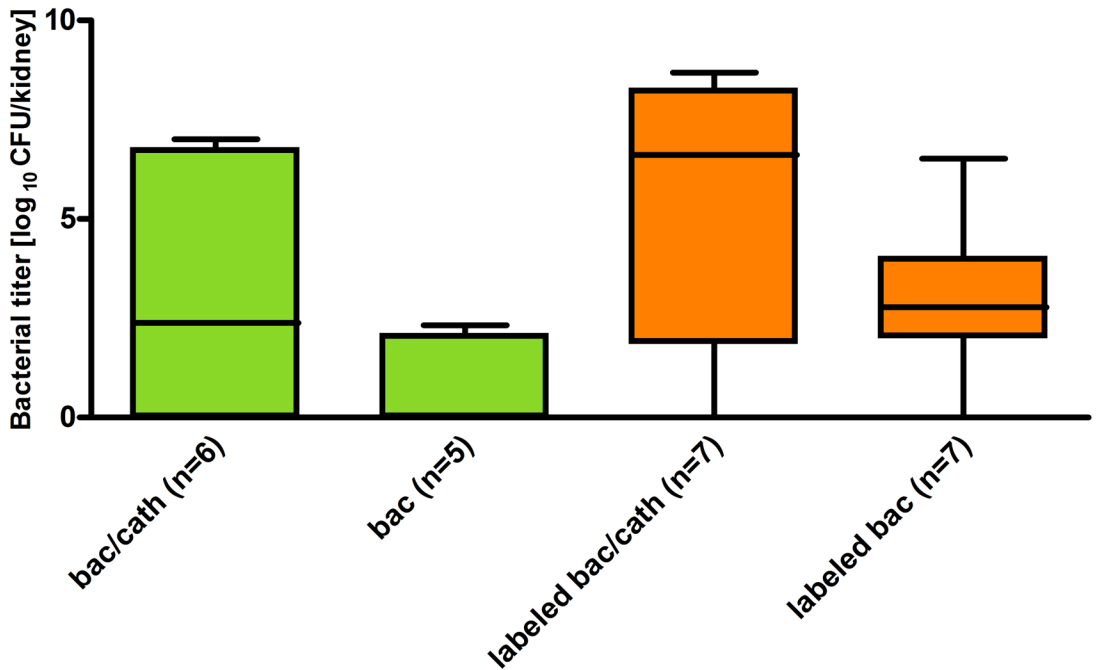

Suppl. Fig. 2: **Infection does not cause generalized sepsis.** Bacterial titer in the kidneys 24 h after infection with  $10^5$  CFU for the different groups used in this study. Groups were: mice with permanent catheter and infection with unlabeled bacteria (bac/cath); sham surgery and infection with unlabeled bacteria (bac); permanent catheter and infection with VSOP-labeled bacteria (labeled bac/cath); sham surgery and infection with labeled bacteria (labeled bac). Box plots show median, 25<sup>th</sup> and 75<sup>th</sup> percentiles and extreme values. No significant differences were observed.
