# Supplementary material for: MRI Visualization of Staphyloccocus aureus-Induced Infective Endocarditis in Mice
Source: PubMed Central journal article supplement (PMC4167704; doi:10.1371/journal.pone.0107179), 2014-09-17
Supplement: pone.0107179.s003.pdf [file pone.0107179.s003.pdf]

| <b>Group A (bac/cath)</b> | <b>Bacterial titer [<math>\log_{10}</math>CFU/heart valve]</b> |
|---------------------------|----------------------------------------------------------------|
| 1                         | 6,64                                                           |
| 2                         | 3,72                                                           |
| 3                         | 6,76                                                           |
| 4                         | 5,39                                                           |
| 5                         | 5,33                                                           |
| 6                         | 9,66                                                           |

| <b>Group B (bac/cath/Fe)</b> |       |
|------------------------------|-------|
| 1                            | 7,77  |
| 2                            | 2,66  |
| 3                            | 3,92  |
| 4                            | 10,21 |
| 5                            | 9,09  |
| 6                            | 8,87  |

| <b>Group C (bac)</b> |      |
|----------------------|------|
| 1                    | 0,00 |
| 2                    | 0,00 |
| 3                    | 0,00 |
| 4                    | 0,00 |
| 5                    | 3,06 |

| <b>Group D (labeled bac/cath)</b> |       |
|-----------------------------------|-------|
| 1                                 | 8,47  |
| 2                                 | 2,72  |
| 3                                 | 4,64  |
| 4                                 | 5,70  |
| 5                                 | 9,70  |
| 6                                 | 10,37 |
| 7                                 | 9,48  |

| <b>Group E (labeled bac/cath/Fe)</b> |      |
|--------------------------------------|------|
| 1                                    | 5,21 |
| 2                                    | 5,14 |
| 3                                    | 6,75 |

| <b>Group F (labeled bac)</b> |      |
|------------------------------|------|
| 1                            | 0,00 |
| 2                            | 0,00 |
| 3                            | 0,00 |
| 4                            | 0,00 |
| 5                            | 3,72 |
| 6                            | 1,00 |
| 7                            | 0,00 |

| <b>Group G (cath)</b> |      |
|-----------------------|------|
| 1                     | 2,78 |
| 2                     | 0,00 |
| 3                     | 0    |

| <b>Group H (cath/Fe)</b> |      |
|--------------------------|------|
| 1                        | 0,00 |
| 2                        | 0    |
| 3                        | 1,40 |
