# Supplementary material for: MRI Visualization of Staphyloccocus aureus-Induced Infective Endocarditis in Mice
Source: PubMed Central journal article supplement (PMC4167704; doi:10.1371/journal.pone.0107179), 2014-09-17
Supplement: pone.0107179.s004.pdf [file pone.0107179.s004.pdf]

| <b>Group A (bac/cath)</b> | <b>Bacterial titer [<math>\log_{10}</math>CFU/kidney]</b> |
|---------------------------|-----------------------------------------------------------|
| 1                         | 6,46                                                      |
| 2                         | 7,00                                                      |
| 3                         | 0,00                                                      |
| 4                         | 0,00                                                      |
| 5                         | 3,38                                                      |
| 6                         | 1,40                                                      |

| <b>Group C (bac)</b> |      |
|----------------------|------|
| 1                    | 0,00 |
| 2                    | 0,00 |
| 3                    | 0,00 |
| 4                    | 2,32 |
| 5                    | 1,78 |

| <b>Group D (labeled bac/cath)</b> |      |
|-----------------------------------|------|
| 1                                 | 7,16 |
| 2                                 | 8,23 |
| 3                                 | 6,61 |
| 4                                 | 8,69 |
| 5                                 | 0,00 |
| 6                                 | 1,88 |
| 7                                 | 1,88 |

| <b>Group F (labeled bac)</b> |      |
|------------------------------|------|
| 1                            | 6,52 |
| 2                            | 4,00 |
| 3                            | 3,18 |
| 4                            | 0,00 |
| 5                            | 2,27 |
| 6                            | 2,78 |
| 7                            | 2,01 |
