# Supplementary material for: MRI Visualization of Staphyloccocus aureus-Induced Infective Endocarditis in Mice
Source: PubMed Central journal article supplement (PMC4167704; doi:10.1371/journal.pone.0107179), 2014-09-17
Supplement: pone.0107179.s005.pdf [file pone.0107179.s005.pdf]

**Endocarditis score**

| Group A (bac/cath) | first reader | second reader |
|--------------------|--------------|---------------|
| 1                  | 3            | 3             |
| 2                  | 3            | 3             |
| 3                  | 2            | 3             |
| 4                  | 5            | 5             |
| 5                  | 4            | 4             |
| 6                  | 0            | 0             |

**Group B (bac/cath/Fe)**

|   |   |   |
|---|---|---|
| 1 | 1 | 0 |
| 2 | 4 | 4 |
| 3 | 5 | 5 |
| 4 | 5 | 5 |
| 5 | 0 | 3 |
| 6 | 4 | 3 |
| 7 | 3 | 2 |
| 8 | 3 | 3 |

**Group C (bac)**

|   |   |   |
|---|---|---|
| 1 | 0 | 0 |
| 2 | 0 | 0 |
| 3 | 2 | 1 |

**Group D (labeled bac/cath)**

|    |   |   |
|----|---|---|
| 1  | 0 | 0 |
| 2  | 3 | 2 |
| 3  | 5 | 4 |
| 4  | 4 | 3 |
| 5  | 2 | 3 |
| 6  | 1 | 2 |
| 7  | 1 | 1 |
| 8  | 0 | 0 |
| 9  | 1 | 1 |
| 10 | 4 | 5 |
| 11 | 3 | 3 |
| 12 | 0 | 1 |
| 13 | 0 | 2 |
| 14 | 3 | 2 |
| 15 | 1 | 0 |
| 16 | 0 | 0 |
| 17 | 1 | 1 |

**Group E (labeled bac/cath/Fe)**

|   |   |   |
|---|---|---|
| 1 | 3 | 3 |
| 2 | 1 | 1 |
| 3 | 1 | 1 |

**Group F (labeled bac)**

|   |   |   |
|---|---|---|
| 1 | 1 | 1 |
| 2 | 0 | 0 |
| 3 | 0 | 1 |
| 4 | 1 | 1 |
| 5 | 0 | 0 |

**Endocarditis score**

| Cine (example of score 0-5) |
|-----------------------------|
|                             |
|                             |
|                             |
| x (5)                       |
| x (4)                       |
|                             |

|  |
|--|
|  |
|  |
|  |
|  |
|  |
|  |
|  |
|  |

|  |
|--|
|  |
|  |
|  |

|       |
|-------|
|       |
|       |
|       |
|       |
|       |
|       |
|       |
| x (0) |
|       |
|       |
| x (3) |
|       |
|       |
|       |
|       |
|       |
|       |

|  |
|--|
|  |
|  |
|  |

|  |
|--|
|  |
|  |
|  |
|  |
|  |

|   |   |   |
|---|---|---|
| 6 | 0 | 0 |
|---|---|---|

|  |
|--|
|  |
|--|

**Group G (cath)**

|   |   |   |
|---|---|---|
| 1 | 0 | 1 |
| 2 | 1 | 0 |
| 3 | 1 | 2 |
| 4 | 1 | 1 |

|       |
|-------|
|       |
|       |
|       |
| x (1) |

**Group H (cath/Fe)**

|   |   |   |
|---|---|---|
| 1 | 0 | 1 |
| 2 | 1 | 2 |
| 3 | 2 | 2 |
| 4 | 1 | 0 |

|       |
|-------|
|       |
|       |
| x (2) |
|       |
